# Supplementary material for: Early SNS-Based Monitoring System for the COVID-19 Outbreak in Japan: A Population-Level Observational Study
Source: PubMed Central journal article supplement (PMC7348074; doi:10.2188/jea.je20200150), 2020-08-05
Supplement: je-30-362-s001.pdf [file je-30-362-s001.pdf]

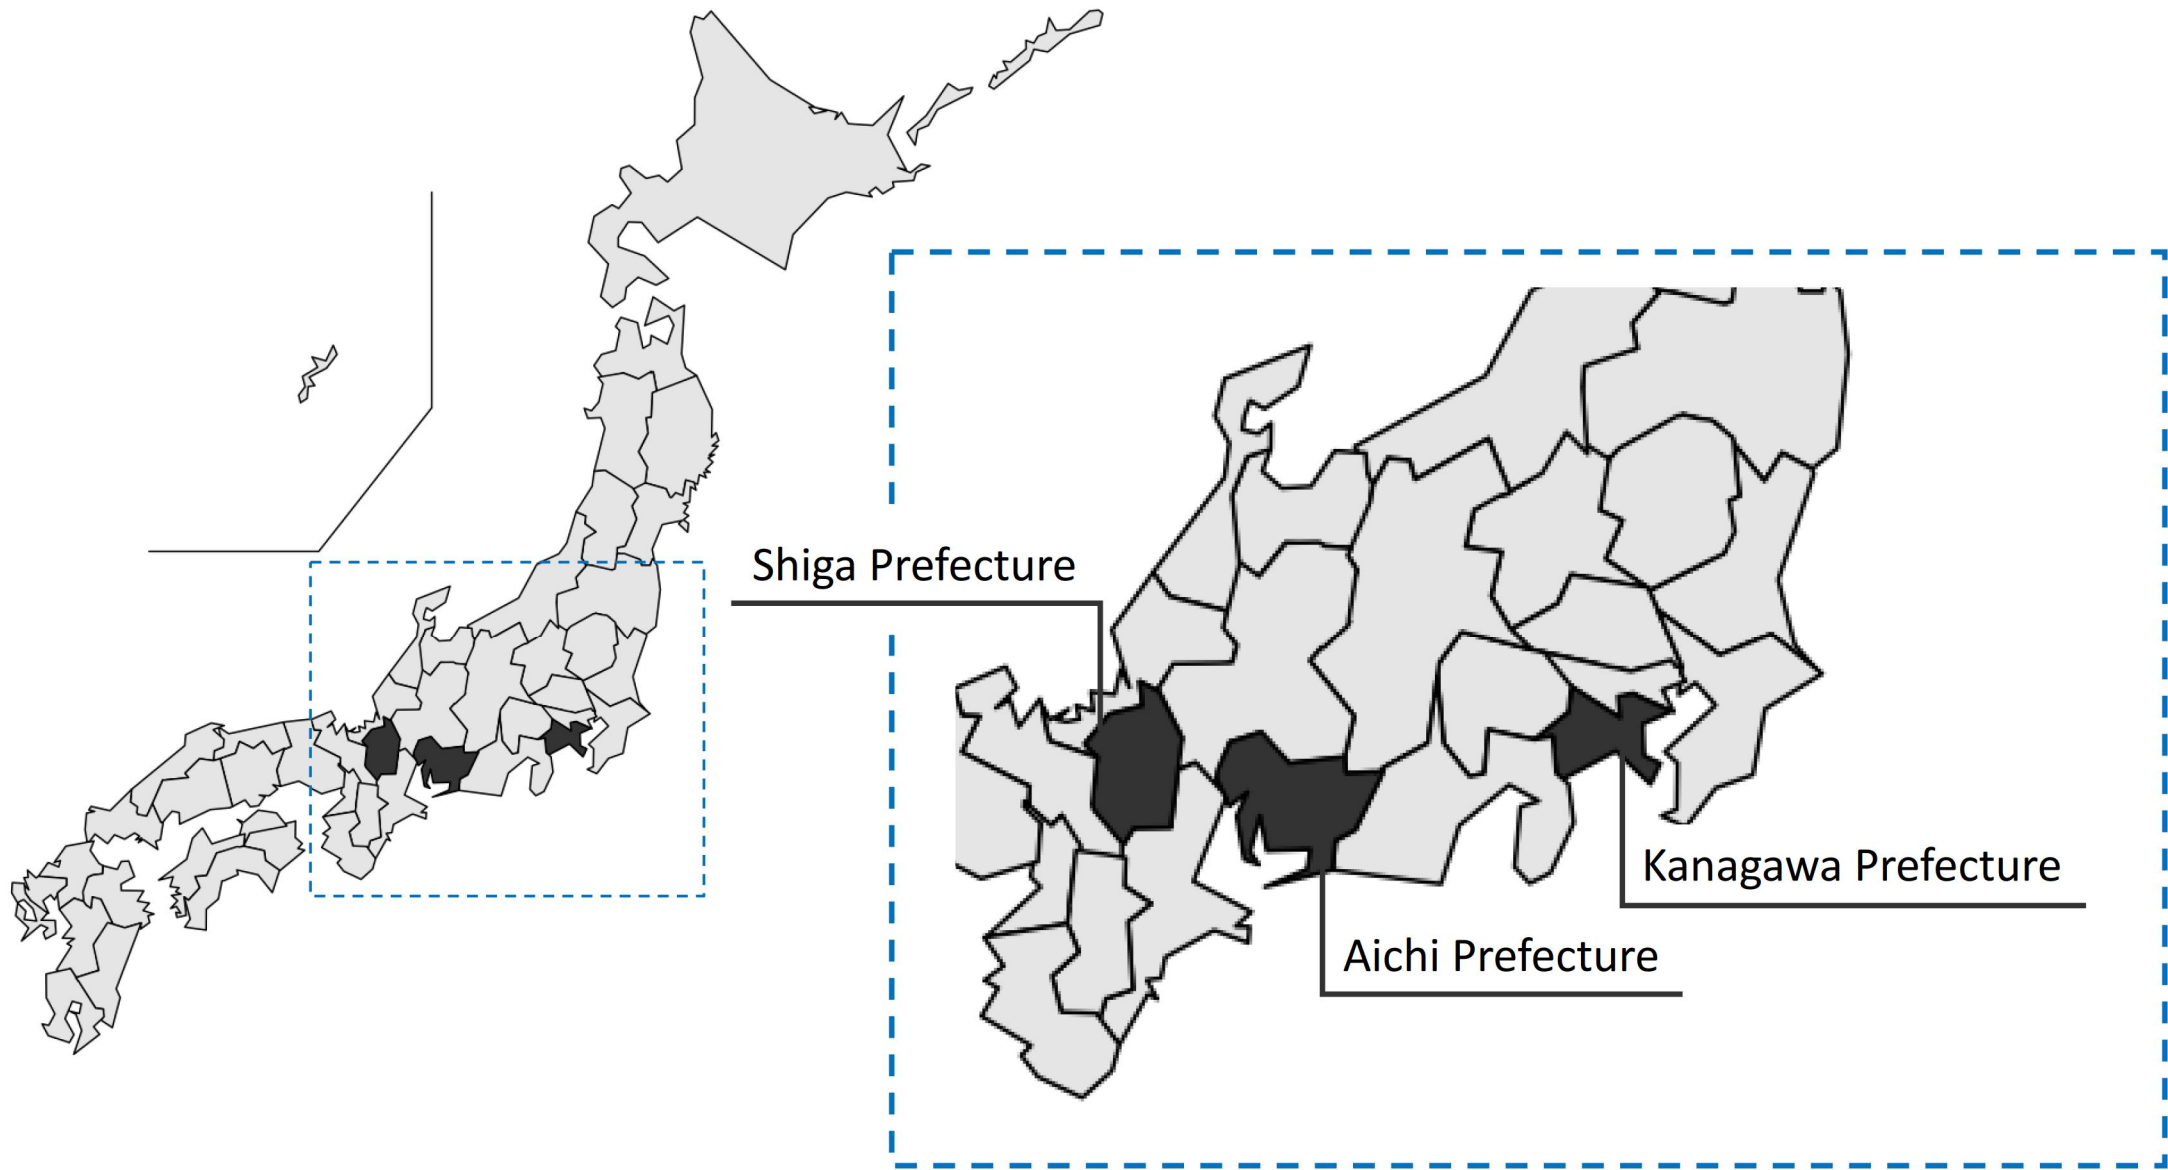

**eFigure 1.** Map of selected three prefectures in Japan.

Weekly trend in the proportion of participants who have a fever

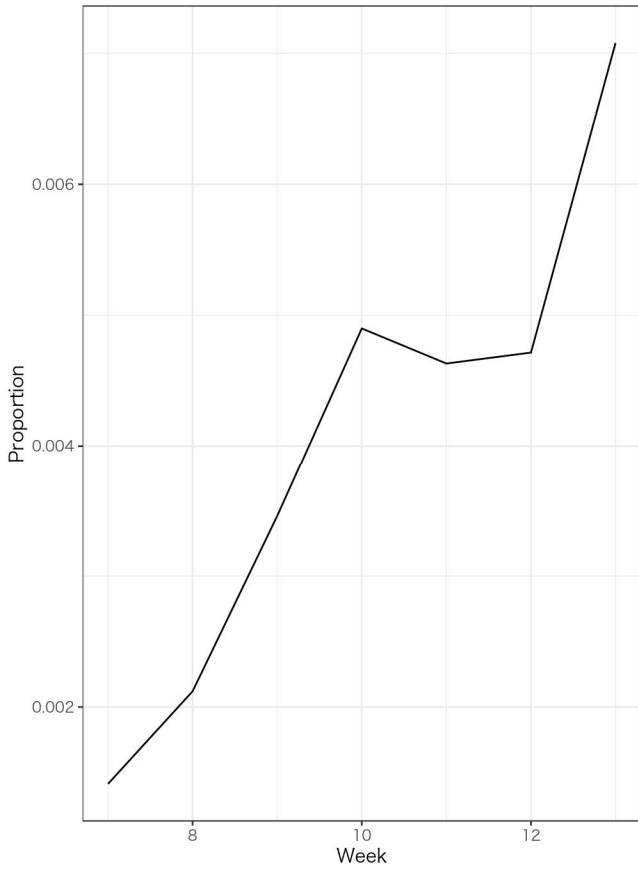

Weekly trend in the reported number of influenza cases

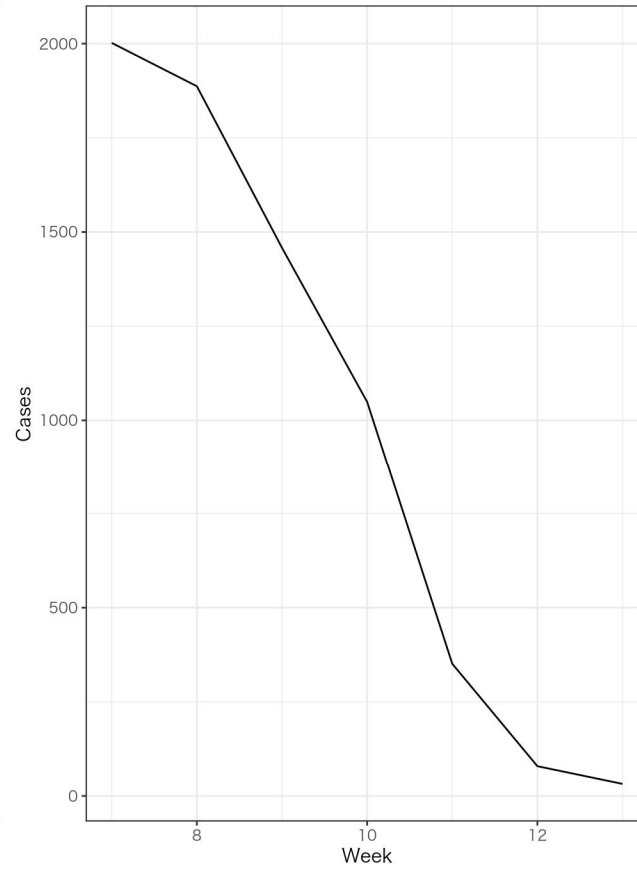

Cross correlation function

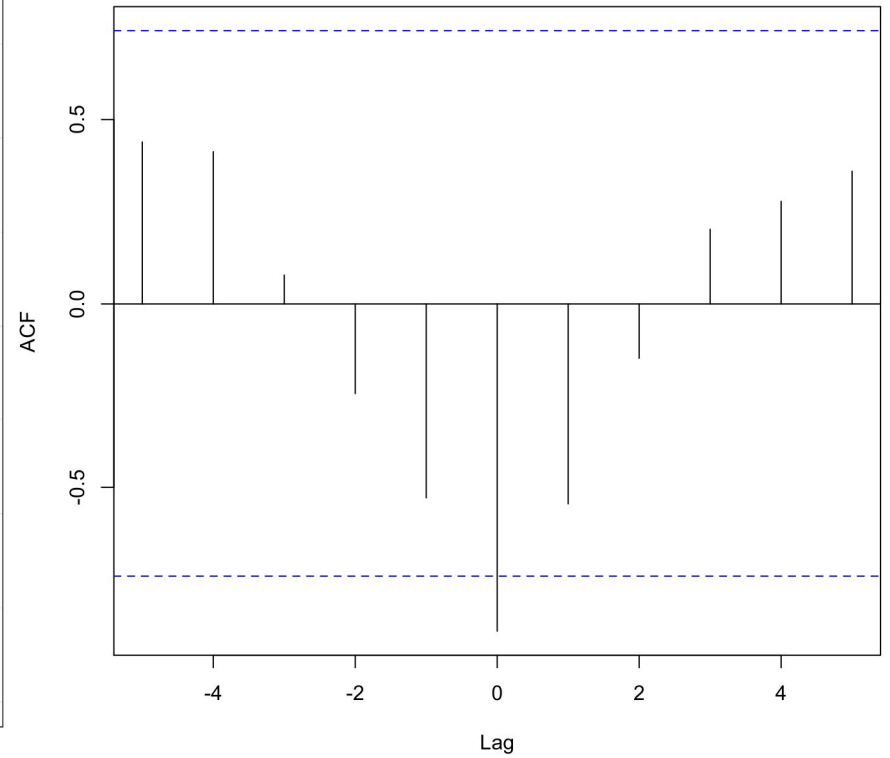

**eFigure 2.** Weekly trend in the proportion of participants who have a fever (left) and the reported number of influenza cases (middle) and cross correlation function between them (right). Blue line in right panel is standard deviation. ACF is autocorrelation function.

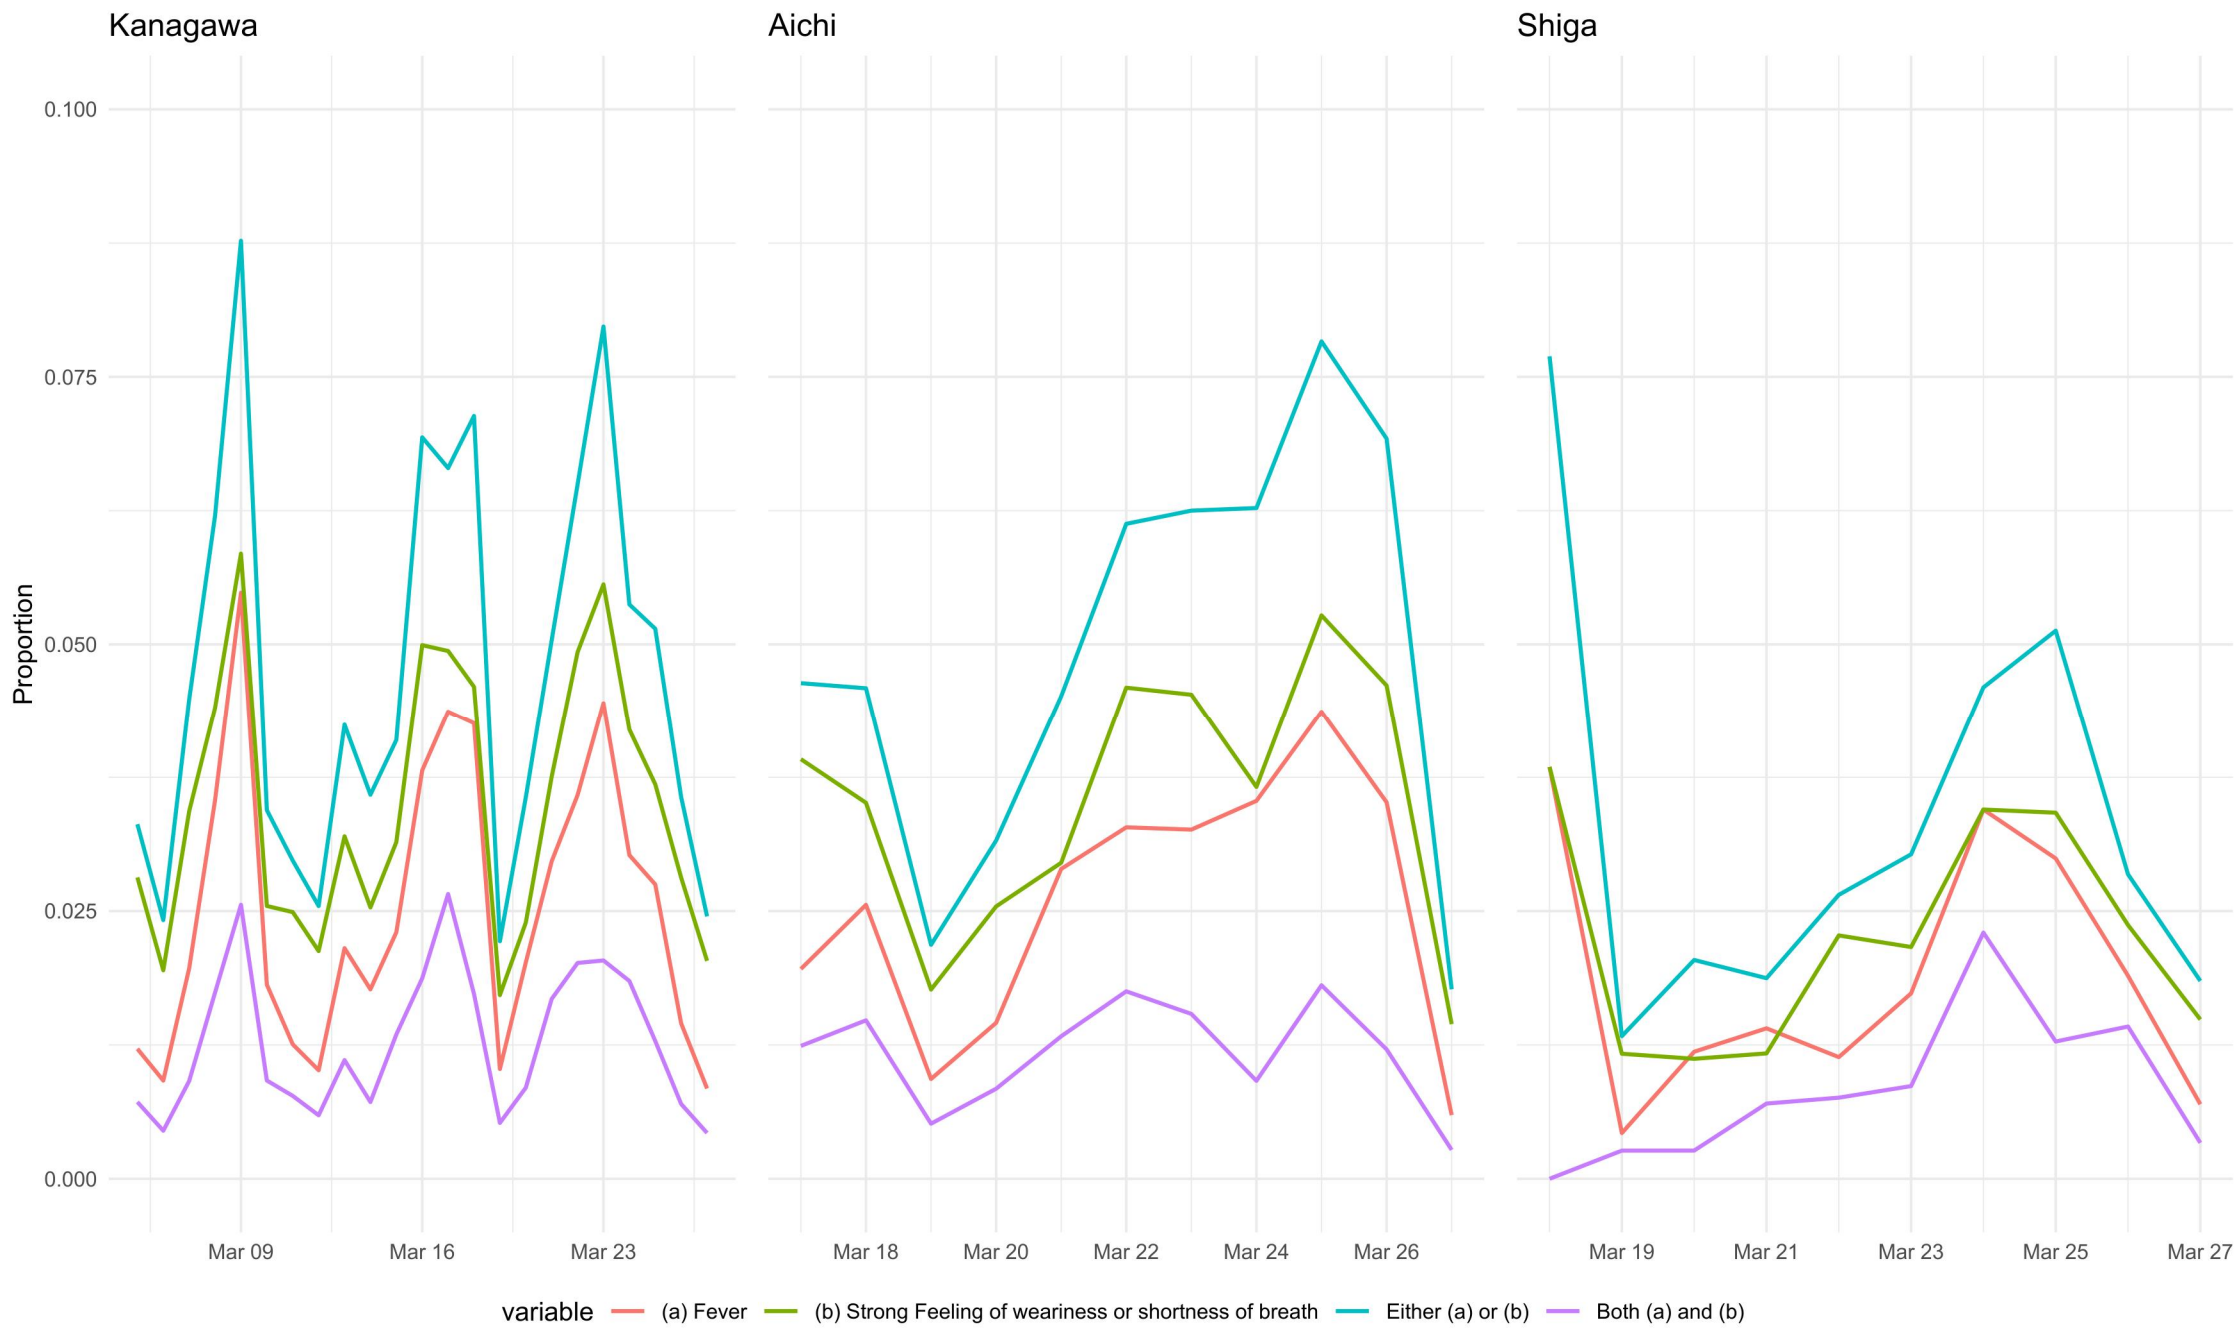

**eFigure 3.** Trend in the proportion of new participants who have non-specific symptoms in each prefecture (left: Kanagawa, middle: Aichi, right: Shiga). Red line, green line, blue line, and purple line indicate the proportion of participants who have a fever (a), a strong feeling of weariness or shortness of breath (b), both (a) and (b), and either (a) or (b), respectively.

**eTable 1.** Demographic characteristics of the participants by health states during the study period for Kanagawa, Aichi, and Shiga prefecture, as of March 30, 2020

| Kanagawa, n=124,766 |                                      |                                                           |                                                                               |                                    |                                          |
|---------------------|--------------------------------------|-----------------------------------------------------------|-------------------------------------------------------------------------------|------------------------------------|------------------------------------------|
|                     | No symptom<br>(n=120,635,<br>96.69%) | (a) Fever $\geq 37.5^{\circ}\text{C}$<br>(n=1,831, 1.47%) | (b) Strong feeling of<br>weariness or shortness of<br>breath (n=3,223, 2.58%) | Both (a) and (b)<br>(n=923, 0.74%) | Either (a) or (b)<br>(n=4,131,<br>3.31%) |
| Age, years          |                                      |                                                           |                                                                               |                                    |                                          |
| Mean (SD)           | 44.82 (12.98)                        | 37.57 (14.31)                                             | 38.53 (12.48)                                                                 | 37.6 (13.77)                       | 38.31 (13.05)                            |
| Range (Min–Max)     | 13–101                               | 13–93                                                     | 13–93                                                                         | 13–93                              | 13–93                                    |
| 13–19               | 3,919 (3.25,<br>94.39)               | 147 (8.03, 3.54)                                          | 144 (4.47, 3.47)                                                              | 58 (6.28, 1.40)                    | 233 (5.64, 5.61)                         |

|       |                          |                   |                   |                      |                        |
|-------|--------------------------|-------------------|-------------------|----------------------|------------------------|
| 20–29 | 10,463 (8.67,<br>92.56)  | 409 (22.34, 3.62) | 653 (20.26, 5.78) | 221 (23.94,<br>1.96) | 841 (20.36,<br>7.44)   |
| 30–39 | 24,610 (20.40,<br>95.34) | 517 (28.24, 2.00) | 948 (29.41, 3.67) | 261 (28.28,<br>1.01) | 1,204 (29.15,<br>4.66) |
| 40–49 | 38,072 (31.56,<br>97.23) | 420 (22.94, 1.07) | 885 (27.46, 2.26) | 220 (23.84,<br>0.56) | 1,085 (26.26,<br>2.77) |
| 50–59 | 28,751 (23.83,<br>98.16) | 202 (11.03, 0.69) | 437 (13.56, 1.49) | 101 (10.94,<br>0.34) | 538 (13.02,<br>1.84)   |
| 60–69 | 11,011 (9.13,<br>98.82)  | 67 (3.66, 0.60)   | 94 (2.92, 0.84)   | 30 (3.25, 0.27)      | 131 (3.17, 1.18)       |
| 70–79 | 3,397 (2.82,<br>97.70)   | 58 (3.17, 1.67)   | 50 (1.55, 1.44)   | 28 (3.03, 0.81)      | 80 (1.94, 2.30)        |

|       |                   |    |    |    |    |
|-------|-------------------|----|----|----|----|
| 80–89 | 398 (0.33, 95.67) | NA | NA | NA | NA |
| ≥90   | 14 (0.01, 93.33)  | NA | NA | NA | NA |

Sex

|          |                          |                     |                     |                      |                        |
|----------|--------------------------|---------------------|---------------------|----------------------|------------------------|
| Female   | 83,320 (69.07,<br>96.93) | 1,074 (58.66, 1.25) | 2,086 (64.72, 2.43) | 524 (56.77,<br>0.61) | 2,636 (63.81,<br>3.07) |
| Male     | 37,129 (30.78,<br>96.18) | NA                  | 1,121 (34.78, 2.90) | NA                   | 1,475 (35.71,<br>3.82) |
| Other    | 186 (0.15, 90.29)        | NA                  | 16 (0.50, 7.77)     | NA                   | 20 (0.48, 9.71)        |
| Pregnant | 1,428 (1.18,<br>96.95)   | 13 (0.71, 0.88)     | 42 (1.30, 2.85)     | 10 (1.08, 0.68)      | 45 (1.09, 3.05)        |

Occupation

---

---

|                   |                          |                   |                     |                      |                        |
|-------------------|--------------------------|-------------------|---------------------|----------------------|------------------------|
| Self-employed     | 8,945 (7.41,<br>96.95)   | 125 (6.83, 1.35)  | 228 (7.07, 2.47)    | 72 (7.80, 0.78)      | 281 (6.80, 3.05)       |
| Employees         | 47,564 (39.43,<br>96.29) | 797 (43.53, 1.61) | 1,434 (44.49, 2.90) | 397 (43.01,<br>0.80) | 1,834 (44.40,<br>3.71) |
| Public officials  | 5,442 (4.51,<br>96.30)   | 99 (5.41, 1.75)   | 166 (5.15, 2.94)    | 56 (6.07, 0.99)      | 209 (5.06, 3.70)       |
| Student           | 6,116 (5.07,<br>94.53)   | 208 (11.36, 3.21) | 234 (7.26, 3.62)    | 88 (9.53, 1.36)      | 354 (8.57, 5.47)       |
| Part-time workers | 23,040 (19.10,<br>97.72) | 221 (12.07, 0.94) | 420 (13.03, 1.78)   | 103 (11.16,<br>0.44) | 538 (13.02,<br>2.28)   |
| Unemployed        | 20,447 (16.95,<br>97.26) | 234 (12.78, 1.11) | 461 (14.30, 2.19)   | 120 (13.00,<br>0.57) | 575 (13.92,<br>2.74)   |

---

|                                                               |                        |                    |                    |                      |                       |
|---------------------------------------------------------------|------------------------|--------------------|--------------------|----------------------|-----------------------|
| Others                                                        | 9,081 (7.53,<br>96.39) | 147 (8.03, 1.56)   | 280 (8.69, 2.97)   | 87 (9.43, 0.92)      | 340 (8.23, 3.61)      |
| Taking antifebrile medications (Loxonin,<br>Caronal, etc.)    |                        |                    |                    |                      |                       |
| Current                                                       | 2,747 (2.28,<br>75.59) | 547 (29.87, 15.05) | 644 (19.98, 17.72) | 304 (32.94,<br>8.37) | 887 (21.47,<br>24.41) |
| Past one month                                                | 6,590 (5.46,<br>92.30) | 202 (11.03, 2.83)  | 472 (14.64, 6.61)  | 124 (13.43,<br>1.74) | 550 (13.31,<br>7.70)  |
| Diseases currently undergoing treatment<br>(multiple answers) |                        |                    |                    |                      |                       |
| Malignant tumor with anticancer<br>drugs                      | 624 (0.52, 94.26)      | 20 (1.09, 3.02)    | 30 (0.93, 4.53)    | 12 (1.30, 1.81)      | 38 (0.92, 5.74)       |



---

|                                          |                     |                 |                  |                 |                  |
|------------------------------------------|---------------------|-----------------|------------------|-----------------|------------------|
| Malignant tumor without anticancer drugs | 1,349 (1.12, 96.77) | NA              | 37 (1.15, 2.65)  | NA              | 45 (1.09, 3.23)  |
| Cardiovascular diseases                  | 2,481 (2.06, 95.90) | 44 (2.40, 1.70) | 92 (2.85, 3.56)  | 30 (3.25, 1.16) | 106 (2.57, 4.10) |
| Kidney diseases                          | 869 (0.72, 94.15)   | 22 (1.20, 2.38) | 50 (1.55, 5.42)  | 18 (1.95, 1.95) | 54 (1.31, 5.85)  |
| Diabetes mellitus                        | 4,206 (3.49, 95.92) | 85 (4.64, 1.94) | 144 (4.47, 3.28) | 50 (5.42, 1.14) | 179 (4.33, 4.08) |
| In dialysis treatment                    | NA                  | NA              | NA               | NA              | NA               |
| Chronic obstructive pulmonary disease    | NA                  | NA              | NA               | 11 (1.19, 2.69) | NA               |
| Treatment with immunosuppressant         | 1,339 (1.11, 95.30) | 31 (1.69, 2.21) | 52 (1.61, 3.70)  | 17 (1.84, 1.21) | 66 (1.60, 4.70)  |

---

| Preventive measures (multiple answers)                                          |                           |                     |                     |                      |                        |
|---------------------------------------------------------------------------------|---------------------------|---------------------|---------------------|----------------------|------------------------|
| Washing hands in running water                                                  | 68,695 (56.94,<br>96.64)  | 1,031 (56.31, 1.45) | 1,861 (57.74, 2.62) | 507 (54.93,<br>0.71) | 2,385 (57.73,<br>3.36) |
| Washing hands with soap and water                                               | 110,991 (92.01,<br>96.88) | 1,555 (84.93, 1.36) | 2,794 (86.69, 2.44) | 780 (84.51,<br>0.68) | 3,569 (86.40,<br>3.12) |
| Hand disinfection with alcohol                                                  | 81,230 (67.34,<br>96.97)  | 1,092 (59.64, 1.30) | 1,972 (61.19, 2.35) | 527 (57.10,<br>0.63) | 2,537 (61.41,<br>3.03) |
| Etiquette (masks, handkerchiefs, etc.)<br>in case of coughing or sneezing       | 110,397 (91.51,<br>96.80) | 1,580 (86.29, 1.39) | 2,863 (88.83, 2.51) | 791 (85.70,<br>0.69) | 3,652 (88.40,<br>3.20) |
| Take time off from school or work<br>when you<br>have a fever or other symptoms | 55,797 (46.25,<br>96.61)  | 1,002 (54.72, 1.73) | 1,442 (44.74, 2.50) | 484 (52.44,<br>0.84) | 1,960 (47.45,<br>3.39) |

|                       |                          |                   |                     |                      |                        |
|-----------------------|--------------------------|-------------------|---------------------|----------------------|------------------------|
| Gargling with water   | 72,605 (60.19,<br>97.00) | 955 (52.16, 1.28) | 1,730 (53.68, 2.31) | 443 (48.00,<br>0.59) | 2,242 (54.27,<br>3.00) |
| Gargling with Isozine | 18,373 (15.23,<br>96.78) | 242 (13.22, 1.27) | 492 (15.27, 2.59)   | 123 (13.33,<br>0.65) | 611 (14.79,<br>3.22)   |
| Regular ventilation   | 62,347 (51.68,<br>97.26) | 742 (40.52, 1.16) | 1,391 (43.16, 2.17) | 374 (40.52,<br>0.58) | 1,759 (42.58,<br>2.74) |
| Maintaining humidity  | 39,640 (32.86,<br>97.41) | 435 (23.76, 1.07) | 835 (25.91, 2.05)   | 214 (23.19,<br>0.53) | 1,056 (25.56,<br>2.59) |
| A well-balanced diet  | 62,850 (52.10,<br>97.79) | 617 (33.70, 0.96) | 1,093 (33.91, 1.70) | 292 (31.64,<br>0.45) | 1,418 (34.33,<br>2.21) |
| Regular exercise      | 32,812 (27.20,<br>98.08) | 287 (15.67, 0.86) | 490 (15.20, 1.46)   | 136 (14.73,<br>0.41) | 641 (15.52,<br>1.92)   |

|                                                       |                          |                   |                     |                      |                        |
|-------------------------------------------------------|--------------------------|-------------------|---------------------|----------------------|------------------------|
| Getting plenty of rest                                | 63,169 (52.36,<br>97.60) | 682 (37.25, 1.05) | 1,204 (37.36, 1.86) | 331 (35.86,<br>0.51) | 1,555 (37.64,<br>2.40) |
| Telework                                              | 11,407 (9.46,<br>96.78)  | 138 (7.54, 1.17)  | 320 (9.93, 2.71)    | 78 (8.45, 0.66)      | 380 (9.20, 3.22)       |
| Staggered commuting                                   | 14,726 (12.21,<br>96.71) | 187 (10.21, 1.23) | 404 (12.53, 2.65)   | 90 (9.75, 0.59)      | 501 (12.13,<br>3.29)   |
| Avoidance of crowds other than<br>staggered commuting | 32,689 (27.10,<br>97.59) | 312 (17.04, 0.93) | 637 (19.76, 1.90)   | 141 (15.28,<br>0.42) | 808 (19.56,<br>2.41)   |
| Staying up-to-date on COVID-19                        | 74,106 (61.43,<br>97.22) | 836 (45.66, 1.10) | 1,691 (52.47, 2.22) | 411 (44.53,<br>0.54) | 2,116 (51.22,<br>2.78) |
| Other preventive measures                             | 1,896 (1.57,<br>96.78)   | 16 (0.87, 0.82)   | 58 (1.80, 2.96)     | 11 (1.19, 0.56)      | 63 (1.53, 3.22)        |

|                        |                   |                 |                 |                 |                  |
|------------------------|-------------------|-----------------|-----------------|-----------------|------------------|
| No preventive measures | 322 (0.27, 88.71) | 20 (1.09, 5.51) | 34 (1.05, 9.37) | 13 (1.41, 3.58) | 41 (0.99, 11.29) |
|------------------------|-------------------|-----------------|-----------------|-----------------|------------------|

Aichi, n=66,558

|  | No symptom<br>(n=64,646,<br>97.13%) | (a) Fever $\geq 37.5^{\circ}\text{C}$<br>(n=866, 1.30%) | (b) Strong feeling of<br>weariness or shortness of<br>breath (n=1,472, 2.21%) | Both (a) and (b)<br>(n=426, 0.64%) | Either (a) or (b)<br>(n=1,912,<br>2.87%) |
|--|-------------------------------------|---------------------------------------------------------|-------------------------------------------------------------------------------|------------------------------------|------------------------------------------|
|--|-------------------------------------|---------------------------------------------------------|-------------------------------------------------------------------------------|------------------------------------|------------------------------------------|

| Age, years      |                        |                 |                 |                 |                  |
|-----------------|------------------------|-----------------|-----------------|-----------------|------------------|
| Mean (SD)       | 43.25 (13.33)          | 37.57 (14.59)   | 37.16 (12.49)   | 36.6 (13.78)    | 37.47 (13.2)     |
| Range (Min–Max) | 13–95                  | 13–90           | 13–86           | 13–86           | 13–90            |
| 13–19           | 2,563 (3.96,<br>95.78) | 63 (7.27, 2.35) | 78 (5.30, 2.91) | 28 (6.57, 1.05) | 113 (5.91, 4.22) |

|       |                          |                   |                   |                      |                      |
|-------|--------------------------|-------------------|-------------------|----------------------|----------------------|
| 20–29 | 7,338 (11.35,<br>94.27)  | 211 (24.36, 2.71) | 348 (23.64, 4.47) | 113 (26.53,<br>1.45) | 446 (23.33,<br>5.73) |
| 30–39 | 15,259 (23.60,<br>96.20) | 267 (30.83, 1.68) | 469 (31.86, 2.96) | 133 (31.22,<br>0.84) | 603 (31.54,<br>3.80) |
| 40–49 | 18,768 (29.03,<br>97.81) | 161 (18.59, 0.84) | 340 (23.10, 1.77) | 81 (19.01, 0.42)     | 420 (21.97,<br>2.19) |
| 50–59 | 13,299 (20.57,<br>98.46) | 82 (9.47, 0.61)   | 165 (11.21, 1.22) | 39 (9.15, 0.29)      | 208 (10.88,<br>1.54) |
| 60–69 | 5,605 (8.67,<br>98.66)   | 45 (5.20, 0.79)   | 47 (3.19, 0.83)   | 16 (3.76, 0.28)      | 76 (3.97, 1.34)      |
| 70–79 | 1,655 (2.56,<br>97.93)   | 30 (3.46, 1.78)   | 19 (1.29, 1.12)   | 14 (3.29, 0.83)      | 35 (1.83, 2.07)      |

|       |                   |    |    |    |    |
|-------|-------------------|----|----|----|----|
| 80–89 | 152 (0.24, 93.83) | NA | NA | NA | NA |
| ≥90   | 7 (0.01, 87.50)   | NA | NA | NA | NA |

Sex

|          |                          |                   |                   |                      |                        |
|----------|--------------------------|-------------------|-------------------|----------------------|------------------------|
| Female   | 44,044 (68.13,<br>97.43) | 503 (58.08, 1.11) | 890 (60.46, 1.97) | 232 (54.46,<br>0.51) | 1,161 (60.72,<br>2.57) |
| Male     | 20,498 (31.71,<br>96.50) | NA                | 575 (39.06, 2.71) | NA                   | 744 (38.91,<br>3.50)   |
| Other    | 104 (0.16, 93.69)        | NA                | 7 (0.48, 6.31)    | NA                   | 7 (0.37, 6.31)         |
| Pregnant | 1,033 (1.60,<br>96.27)   | 13 (1.50, 1.21)   | 34 (2.31, 3.17)   | 7 (1.64, 0.65)       | 40 (2.09, 3.73)        |

Occupation

---

---

|                   |                          |                   |                   |                      |                      |
|-------------------|--------------------------|-------------------|-------------------|----------------------|----------------------|
| Self-employed     | 5,256 (8.13,<br>97.28)   | 68 (7.85, 1.26)   | 112 (7.61, 2.07)  | 33 (7.75, 0.61)      | 147 (7.69, 2.72)     |
| Employees         | 24,243 (37.50,<br>96.80) | 367 (42.38, 1.47) | 621 (42.19, 2.48) | 187 (43.90,<br>0.75) | 801 (41.89,<br>3.20) |
| Public officials  | 3,728 (5.77,<br>97.39)   | 52 (6.00, 1.36)   | 79 (5.37, 2.06)   | 31 (7.28, 0.81)      | 100 (5.23, 2.61)     |
| Student           | 3,755 (5.81,<br>95.52)   | 89 (10.28, 2.26)  | 124 (8.42, 3.15)  | 37 (8.69, 0.94)      | 176 (9.21, 4.48)     |
| Part-time workers | 13,030 (20.16,<br>97.92) | 107 (12.36, 0.80) | 226 (15.35, 1.70) | 56 (13.15, 0.42)     | 277 (14.49,<br>2.08) |
| Unemployed        | 10,194 (15.77,<br>97.37) | 118 (13.63, 1.13) | 206 (13.99, 1.97) | 49 (11.50, 0.47)     | 275 (14.38,<br>2.63) |

---



|                                                               |                        |                    |                    |                      |                       |
|---------------------------------------------------------------|------------------------|--------------------|--------------------|----------------------|-----------------------|
| Others                                                        | 4,440 (6.87,<br>97.03) | 65 (7.51, 1.42)    | 104 (7.07, 2.27)   | 33 (7.75, 0.72)      | 136 (7.11, 2.97)      |
| Taking antifebrile medications (Loxonin,<br>Caronal, etc.)    |                        |                    |                    |                      |                       |
| Current                                                       | 1,640 (2.54,<br>79.19) | 255 (29.45, 12.31) | 320 (21.74, 15.45) | 144 (33.80,<br>6.95) | 431 (22.54,<br>20.81) |
| Past one month                                                | 3,490 (5.40,<br>92.84) | 104 (12.01, 2.77)  | 218 (14.81, 5.80)  | 53 (12.44, 1.41)     | 269 (14.07,<br>7.16)  |
| Diseases currently undergoing treatment<br>(multiple answers) |                        |                    |                    |                      |                       |
| Malignant tumor with anticancer<br>drugs                      | 371 (0.57, 96.11)      | 11 (1.27, 2.85)    | 11 (0.75, 2.85)    | 7 (1.64, 1.81)       | 15 (0.78, 3.89)       |

|                                          |                     |                 |                 |                 |                 |
|------------------------------------------|---------------------|-----------------|-----------------|-----------------|-----------------|
| Malignant tumor without anticancer drugs | 651 (1.01, 97.89)   | 9 (1.04, 1.35)  | NA              | NA              | 14 (0.73, 2.11) |
| Cardiovascular diseases                  | 1,268 (1.96, 95.63) | 21 (2.42, 1.58) | 48 (3.26, 3.62) | 11 (2.58, 0.83) | 58 (3.03, 4.37) |
| Kidney diseases                          | 544 (0.84, 94.12)   | 12 (1.39, 2.08) | 31 (2.11, 5.36) | 9 (2.11, 1.56)  | 34 (1.78, 5.88) |
| Diabetes mellitus                        | 2,371 (3.67, 96.62) | 48 (5.54, 1.96) | 62 (4.21, 2.53) | 27 (6.34, 1.10) | 83 (4.34, 3.38) |
| In dialysis treatment                    | NA                  | NA              | NA              | NA              | NA              |
| Chronic obstructive pulmonary disease    | 174 (0.27, 92.55)   | NA              | 13 (0.88, 6.91) | NA              | 14 (0.73, 7.45) |
| Treatment with immunosuppressant         | 692 (1.07, 95.58)   | 13 (1.50, 1.80) | 26 (1.77, 3.59) | 7 (1.64, 0.97)  | 32 (1.67, 4.42) |
| Preventive measures (multiple answers)   |                     |                 |                 |                 |                 |

|                                                                                 |                          |                   |                     |                      |                        |
|---------------------------------------------------------------------------------|--------------------------|-------------------|---------------------|----------------------|------------------------|
| Washing hands in running water                                                  | 38,166 (59.04,<br>97.08) | 505 (58.31, 1.28) | 882 (59.92, 2.24)   | 241 (56.57,<br>0.61) | 1,146 (59.94,<br>2.92) |
| Washing hands with soap and water                                               | 55,733 (86.21,<br>97.31) | 686 (79.21, 1.20) | 1,179 (80.10, 2.06) | 326 (76.53,<br>0.57) | 1,539 (80.49,<br>2.69) |
| Hand disinfection with alcohol                                                  | 42,230 (65.33,<br>97.42) | 487 (56.24, 1.12) | 860 (58.42, 1.98)   | 230 (53.99,<br>0.53) | 1,117 (58.42,<br>2.58) |
| Etiquette (masks, handkerchiefs, etc.)<br>in case of coughing or sneezing       | 57,439 (88.85,<br>97.30) | 704 (81.29, 1.19) | 1,229 (83.49, 2.08) | 337 (79.11,<br>0.57) | 1,596 (83.47,<br>2.70) |
| Take time off from school or work<br>when you have<br>a fever or other symptoms | 26,335 (40.74,<br>97.06) | 420 (48.50, 1.55) | 582 (39.54, 2.14)   | 203 (47.65,<br>0.75) | 799 (41.79,<br>2.94)   |

|                       |                          |                   |                   |                      |                      |
|-----------------------|--------------------------|-------------------|-------------------|----------------------|----------------------|
| Gargling with water   | 34,514 (53.39,<br>97.51) | 394 (45.50, 1.11) | 671 (45.58, 1.90) | 183 (42.96,<br>0.52) | 882 (46.13,<br>2.49) |
| Gargling with Isozine | 8,477 (13.11,<br>97.28)  | 102 (11.78, 1.17) | 178 (12.09, 2.04) | 43 (10.09, 0.49)     | 237 (12.40,<br>2.72) |
| Regular ventilation   | 31,096 (48.10,<br>97.72) | 316 (36.49, 0.99) | 564 (38.32, 1.77) | 155 (36.38,<br>0.49) | 725 (37.92,<br>2.28) |
| Maintaining humidity  | 17,723 (27.42,<br>97.91) | 178 (20.55, 0.98) | 282 (19.16, 1.56) | 81 (19.01, 0.45)     | 379 (19.82,<br>2.09) |
| A well-balanced diet  | 29,646 (45.86,<br>98.19) | 212 (24.48, 0.70) | 420 (28.53, 1.39) | 87 (20.42, 0.29)     | 545 (28.50,<br>1.81) |
| Regular exercise      | 16,209 (25.07,<br>98.46) | 107 (12.36, 0.65) | 188 (12.77, 1.14) | 41 (9.62, 0.25)      | 254 (13.28,<br>1.54) |

|                                                       |                          |                   |                   |                      |                      |
|-------------------------------------------------------|--------------------------|-------------------|-------------------|----------------------|----------------------|
| Getting plenty of rest                                | 31,418 (48.60,<br>98.08) | 268 (30.95, 0.84) | 463 (31.45, 1.45) | 115 (27.00,<br>0.36) | 616 (32.22,<br>1.92) |
| Telework                                              | 2,723 (4.21,<br>97.49)   | 29 (3.35, 1.04)   | 59 (4.01, 2.11)   | 18 (4.23, 0.64)      | 70 (3.66, 2.51)      |
| Staggered commuting                                   | 3,755 (5.81,<br>97.20)   | 52 (6.00, 1.35)   | 84 (5.71, 2.17)   | 28 (6.57, 0.72)      | 108 (5.65, 2.80)     |
| Avoidance of crowds other than<br>staggered commuting | 13,983 (21.63,<br>98.01) | 104 (12.01, 0.73) | 227 (15.42, 1.59) | 47 (11.03, 0.33)     | 284 (14.85,<br>1.99) |
| Staying up-to-date on COVID-19                        | 36,718 (56.80,<br>97.74) | 328 (37.88, 0.87) | 655 (44.50, 1.74) | 133 (31.22,<br>0.35) | 850 (44.46,<br>2.26) |
| Other preventive measures                             | 925 (1.43, 97.88)        | NA                | 19 (1.29, 2.01)   | NA                   | 20 (1.05, 2.12)      |
| No preventive measures                                | 325 (0.50, 92.86)        | 15 (1.73, 4.29)   | 22 (1.49, 6.29)   | 12 (2.82, 3.43)      | 25 (1.31, 7.14)      |

| Shiga, n=14,894 |                                     |                                                         |                                                                             |                                   |                                     |
|-----------------|-------------------------------------|---------------------------------------------------------|-----------------------------------------------------------------------------|-----------------------------------|-------------------------------------|
|                 | No symptom<br>(n=14,610,<br>98.09%) | (a) Fever $\geq 37.5^{\circ}\text{C}$<br>(n=124, 0.83%) | (b) Strong feeling of<br>weariness or shortness of<br>breath (n=221, 1.48%) | Both (a) and (b)<br>(n=61, 0.41%) | Either (a) or (b)<br>(n=284, 1.91%) |
| Age, years      |                                     |                                                         |                                                                             |                                   |                                     |
| Mean (SD)       | 45.54 (13.81)                       | 39.94 (16.24)                                           | 39.63 (14.79)                                                               | 40.95 (17.21)                     | 39.48 (14.88)                       |
| Range (Min–Max) | 13–88                               | 13–80                                                   | 13–87                                                                       | 13–78                             | 13–87                               |
| 13–19           | 474 (3.24, 95.37)                   | NA                                                      | 17 (7.69, 3.42)                                                             | NA                                | 23 (8.10, 4.63)                     |
| 20–29           | 1,291 (8.84,<br>96.70)              | 22 (17.74, 1.65)                                        | 31 (14.03, 2.32)                                                            | 9 (14.75, 0.67)                   | 44 (15.49, 3.30)                    |

|       |                         |                  |                  |                  |                  |
|-------|-------------------------|------------------|------------------|------------------|------------------|
| 30–39 | 2,975 (20.36,<br>97.29) | 37 (29.84, 1.21) | 68 (30.77, 2.22) | 22 (36.07, 0.72) | 83 (29.23, 2.71) |
| 40–49 | 4,279 (29.29,<br>98.44) | 24 (19.35, 0.55) | 54 (24.43, 1.24) | 10 (16.39, 0.23) | 68 (23.94, 1.56) |
| 50–59 | 3,196 (21.88,<br>98.79) | NA               | 30 (13.57, 0.93) | NA               | 39 (13.73, 1.21) |
| 60–69 | 1,739 (11.90,<br>99.14) | NA               | 11 (4.98, 0.63)  | NA               | 15 (5.28, 0.86)  |
| 70–79 | 602 (4.12, 98.53)       | 8 (6.45, 1.31)   | 8 (3.62, 1.31)   | 7 (11.48, 1.15)  | 9 (3.17, 1.47)   |
| 80–89 | NA                      | NA               | NA               | NA               | NA               |
| ≥90   | NA                      | NA               | NA               | NA               | NA               |

Sex

---

|               |                         |                  |                   |                  |                      |
|---------------|-------------------------|------------------|-------------------|------------------|----------------------|
| Female        | 9,922 (67.91,<br>98.22) | 71 (57.26, 0.70) | 141 (63.80, 1.40) | 32 (52.46, 0.32) | 180 (63.38,<br>1.78) |
| Male          | 4,670 (31.96,<br>97.82) | 53 (42.74, 1.11) | 80 (36.20, 1.68)  | 29 (47.54, 0.61) | 104 (36.62,<br>2.18) |
| Other         | 18 (0.12, 100.00)       | NA               | NA                | NA               | NA                   |
| Pregnant      | 183 (1.25, 98.92)       | NA               | NA                | NA               | NA                   |
| Occupation    |                         |                  |                   |                  |                      |
| Self-employed | 1,128 (7.72,<br>98.26)  | 12 (9.68, 1.05)  | 15 (6.79, 1.31)   | 7 (11.48, 0.61)  | 20 (7.04, 1.74)      |
| Employees     | 4,809 (32.92,<br>97.96) | 49 (39.52, 1.00) | 77 (34.84, 1.57)  | 26 (42.62, 0.53) | 100 (35.21,<br>2.04) |



|                   |                         |                  |                  |                  |                  |
|-------------------|-------------------------|------------------|------------------|------------------|------------------|
| Public officials  | 1,057 (7.23,<br>98.51)  | NA               | 14 (6.33, 1.30)  | NA               | 16 (5.63, 1.49)  |
| Student           | 762 (5.22, 96.21)       | NA               | 23 (10.41, 2.90) | NA               | 30 (10.56, 3.79) |
| Part-time workers | 3,165 (21.66,<br>98.54) | NA               | 34 (15.38, 1.06) | NA               | 47 (16.55, 1.46) |
| Unemployed        | 2,645 (18.10,<br>98.18) | 22 (17.74, 0.82) | 37 (16.74, 1.37) | 10 (16.39, 0.37) | 49 (17.25, 1.82) |
| Others            | 1,044 (7.15,<br>97.94)  | NA               | 21 (9.50, 1.97)  | NA               | 22 (7.75, 2.06)  |

Taking antifebrile medications (Loxonin,  
Caronal, etc.)

|                |                     |                  |                   |                  |                   |
|----------------|---------------------|------------------|-------------------|------------------|-------------------|
| Current        | 465 (3.18, 84.09)   | 45 (36.29, 8.14) | 69 (31.22, 12.48) | 26 (42.62, 4.70) | 88 (30.99, 15.91) |
| Past one month | 1,133 (7.75, 95.05) | 17 (13.71, 1.43) | 53 (23.98, 4.45)  | 11 (18.03, 0.92) | 59 (20.77, 4.95)  |

Diseases currently undergoing treatment

(multiple answers)

|                                          |                   |    |                 |    |                 |
|------------------------------------------|-------------------|----|-----------------|----|-----------------|
| Malignant tumor with anticancer drugs    | NA                | NA | NA              | NA | NA              |
| Malignant tumor without anticancer drugs | NA                | NA | NA              | NA | NA              |
| Cardiovascular diseases                  | 363 (2.48, 97.06) | NA | 10 (4.52, 2.67) | NA | 11 (3.87, 2.94) |
| Kidney diseases                          | 140 (0.96, 95.89) | NA | NA              | NA | 6 (2.11, 4.11)  |

|                                        |                       |                   |                   |                  |                   |
|----------------------------------------|-----------------------|-------------------|-------------------|------------------|-------------------|
| Diabetes mellitus                      | 575 (3.94, 97.13)     | 8 (6.45, 1.35)    | 16 (7.24, 2.70)   | 7 (11.48, 1.18)  | 17 (5.99, 2.87)   |
| In dialysis treatment                  | NA                    | NA                | NA                | NA               | NA                |
| Chronic obstructive pulmonary disease  | NA                    | NA                | NA                | NA               | NA                |
| Treatment with immunosuppressant       | 160 (1.10, 93.57)     | 8 (6.45, 4.68)    | NA                | NA               | 11 (3.87, 6.43)   |
| Preventive measures (multiple answers) |                       |                   |                   |                  |                   |
| Washing hands in running water         | 8,156 (55.82, 97.92)  | 65 (52.42, 0.78)  | 139 (62.90, 1.67) | 31 (50.82, 0.37) | 173 (60.92, 2.08) |
| Washing hands with soap and water      | 12,655 (86.62, 98.22) | 103 (83.06, 0.80) | 173 (78.28, 1.34) | 47 (77.05, 0.36) | 229 (80.63, 1.78) |
| Hand disinfection with alcohol         | 9,352 (64.01, 98.13)  | 77 (62.10, 0.81)  | 137 (61.99, 1.44) | 36 (59.02, 0.38) | 178 (62.68, 1.87) |

|                                                                                 |                          |                  |                   |                  |                      |
|---------------------------------------------------------------------------------|--------------------------|------------------|-------------------|------------------|----------------------|
| Etiquette (masks, handkerchiefs, etc.)<br>in case of coughing or sneezing       | 12,802 (87.62,<br>98.27) | 94 (75.81, 0.72) | 173 (78.28, 1.33) | 41 (67.21, 0.31) | 226 (79.58,<br>1.73) |
| Take time off from school or work<br>when you have a fever or other<br>symptoms | 5,777 (39.54,<br>98.10)  | 58 (46.77, 0.98) | 82 (37.10, 1.39)  | 28 (45.90, 0.48) | 112 (39.44,<br>1.90) |
| Gargling with water                                                             | 7,494 (51.29,<br>98.42)  | 57 (45.97, 0.75) | 88 (39.82, 1.16)  | 25 (40.98, 0.33) | 120 (42.25,<br>1.58) |
| Gargling with Isozine                                                           | 1,942 (13.29,<br>97.44)  | 20 (16.13, 1.00) | 39 (17.65, 1.96)  | 8 (13.11, 0.40)  | 51 (17.96, 2.56)     |
| Regular ventilation                                                             | 6,395 (43.77,<br>98.43)  | 44 (35.48, 0.68) | 78 (35.29, 1.20)  | 20 (32.79, 0.31) | 102 (35.92,<br>1.57) |

|                                                       |                         |                  |                  |                  |                      |
|-------------------------------------------------------|-------------------------|------------------|------------------|------------------|----------------------|
| Maintaining humidity                                  | 3,723 (25.48,<br>98.26) | 34 (27.42, 0.90) | 47 (21.27, 1.24) | 15 (24.59, 0.40) | 66 (23.24, 1.74)     |
| A well-balanced diet                                  | 6,726 (46.04,<br>98.78) | 44 (35.48, 0.65) | 56 (25.34, 0.82) | 17 (27.87, 0.25) | 83 (29.23, 1.22)     |
| Regular exercise                                      | 3,736 (25.57,<br>98.91) | 26 (20.97, 0.69) | 26 (11.76, 0.69) | 11 (18.03, 0.29) | 41 (14.44, 1.09)     |
| Getting plenty of rest                                | 6,852 (46.90,<br>98.53) | 44 (35.48, 0.63) | 83 (37.56, 1.19) | 25 (40.98, 0.36) | 102 (35.92,<br>1.47) |
| Telework                                              | NA                      | NA               | NA               | NA               | NA                   |
| Staggered commuting                                   | 565 (3.87, 98.26)       | NA               | 8 (3.62, 1.39)   | NA               | 10 (3.52, 1.74)      |
| Avoidance of crowds other than<br>staggered commuting | 2,794 (19.12,<br>98.62) | NA               | 29 (13.12, 1.02) | NA               | 39 (13.73, 1.38)     |

|                                |                         |                  |                   |                  |                      |
|--------------------------------|-------------------------|------------------|-------------------|------------------|----------------------|
| Staying up-to-date on COVID-19 | 8,264 (56.56,<br>98.39) | 52 (41.94, 0.62) | 105 (47.51, 1.25) | 22 (36.07, 0.26) | 135 (47.54,<br>1.61) |
| Other preventive measures      | 179 (1.23, 96.24)       | NA               | 6 (2.71, 3.23)    | NA               | 7 (2.46, 3.76)       |
| No preventive measures         | 69 (0.47, 87.34)        | NA               | 8 (3.62, 10.13)   | NA               | 10 (3.52, 12.66)     |

SD, standard deviation.

\* For the purpose of anonymization, all cells with less than five people are indicated as NA. In addition, when the number of persons of cells less than five can be uniquely calculated by a combination of numbers (n, %) of a plurality of cells, all the cells of the combination are set to NA (cells with fewer samples are labeled NA preferentially).
